# Supplementary material
Source: Copernicus journal article supplement (doi:10.5194/egusphere-2025-5100)
Supplement: Supplementary file [file egusphere-2025-5100-RC2-supplement.pdf]

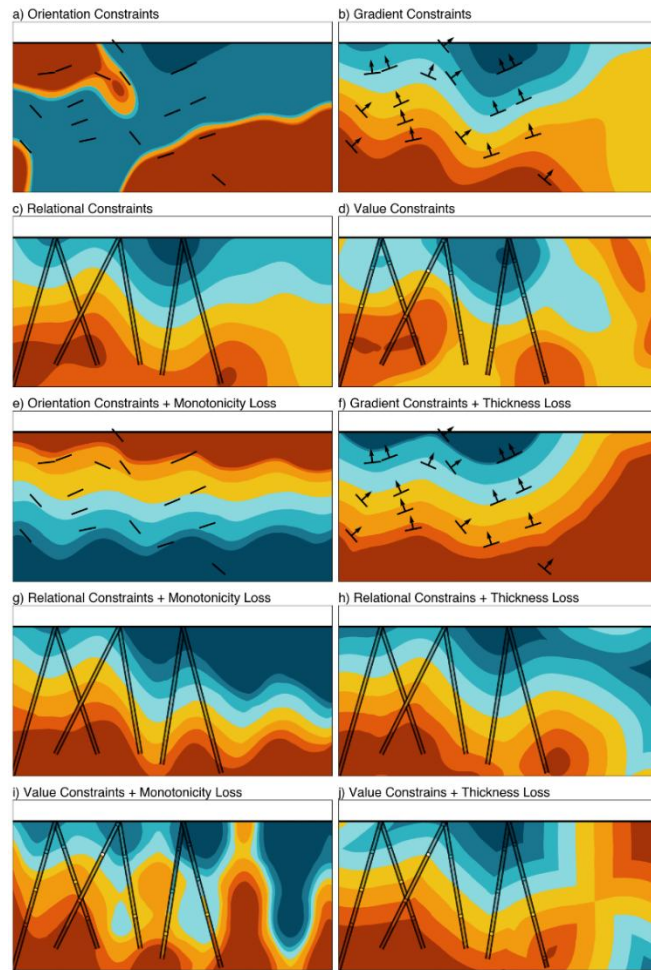

Figure 4 after rerunning the Jupyter notebooks. Plots a) and i) seem quite different compared to the original manuscript.

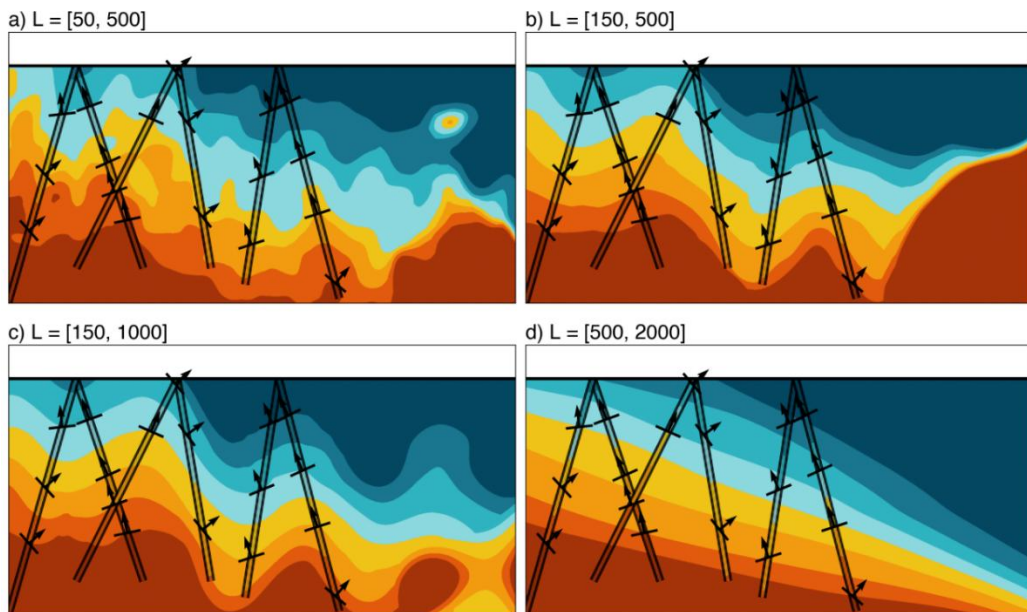

Figure 5 after rerunning the Jupyter notebooks. Plot d) is very different compared to the original manuscript.

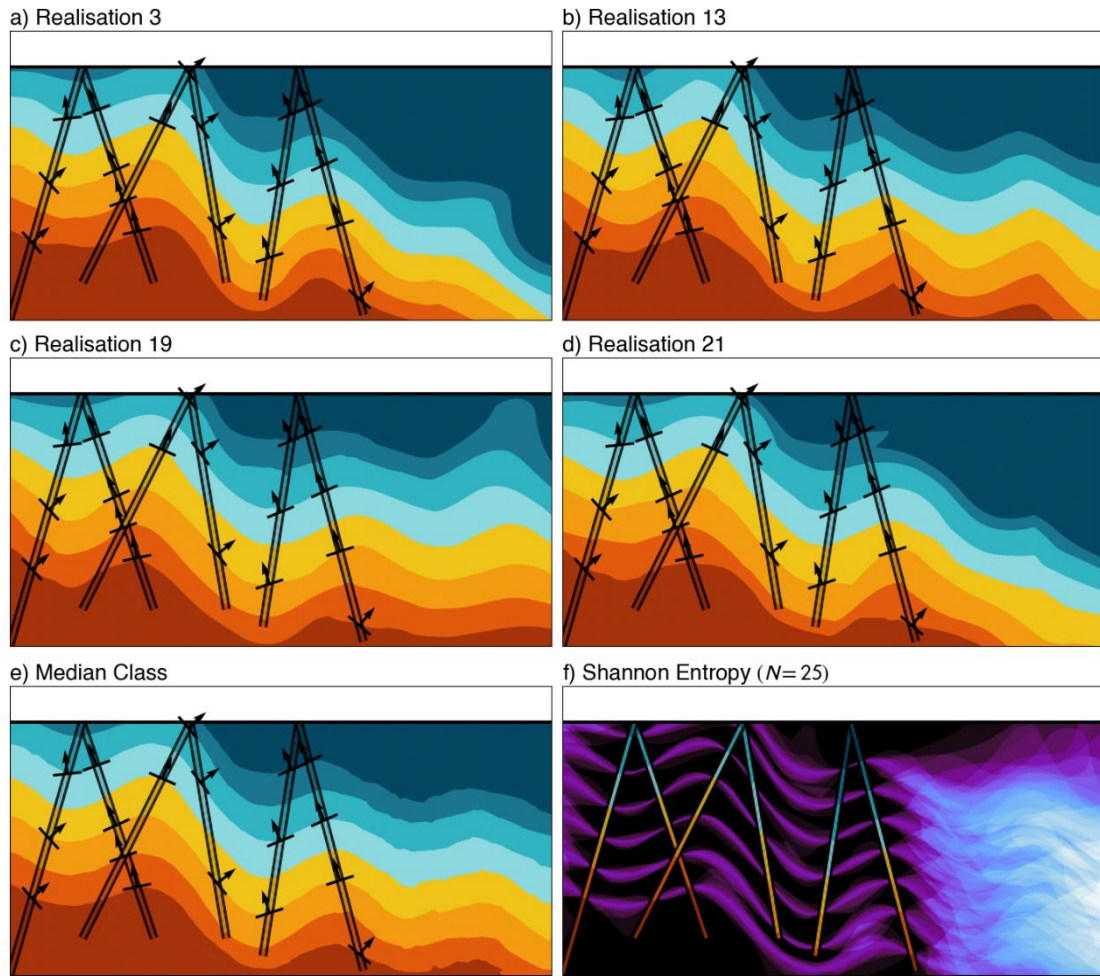

Figure 9 after rerunning the Jupyter notebooks. This output is also different compared to the original manuscript but the interpretations remain the same.
